# Supplementary material for: MOCVD Growth of Covalent and 2D Ga–Se: A Raman Microscopy-Based Phase Validation
Source: Research Square preprint supplement (doi:10.21203/rs.3.rs-7318333/v1), 2025-08-21
Supplement: Supplementary file 1 [file 433c2666afc764443c03a29b.docx]

Supporting Information

**MOCVD Growth of Covalent and 2D Ga–Se: A Raman Microscopy-Based Phase Validation**

Nils Fritjof Langlotz1,2, Robin Günkel1,2, Dominik Muth1,2, Imad Limame3, Naghmeh Ghadghooni1,2, Max Bergmann1,2, Marcel Kröner1,2, Jürgen Belz1,2, Andreas Beyer1,2, Stephan Reizenstein3, Marina Gerhard1,2, Kerstin Volz1,2*

*1mar.quest |Marburg Center for Quantum Materials and Sustainable and Technologies, Philipps-Universität Marburg, 35032 Marburg, Germany*

*2Department of Physics, Philipps-Universität Marburg, Hans Meerwein Str. 6, 35032 Marburg, Germany*

*3Institute of Physics and Astronomy, Technical University of, Hardenbergstraße 36, 10623 Berlin, Germany*

*[*kerstin.volz@physik.uni-marburg.de](mailto:*kerstin.volz@physik.uni-marburg.de)*

Table of contents:

**S1.** Evaluation of GaSe on Sapphire Substrates at 450 °C
**S2.** Evaluation of GaSe on Sapphire Substrates at 500–550 °C
**S3.** Evaluation of Ga2Se3 on Sapphire Substrates
**S4.** Evaluation of Ga2Se3 on GaP/Si Substrates
**S5.** Comparison of GaP/Si and Sapphire Substrates
**S6.** EDX Analysis of the Ga2Se3 Layer on GaP/Si (Figure 2e)
**S7.** EDX Analysis of GaSe on GaP/Si (Figure 3a,c)
**S8.** MOCVD Reactor Setup


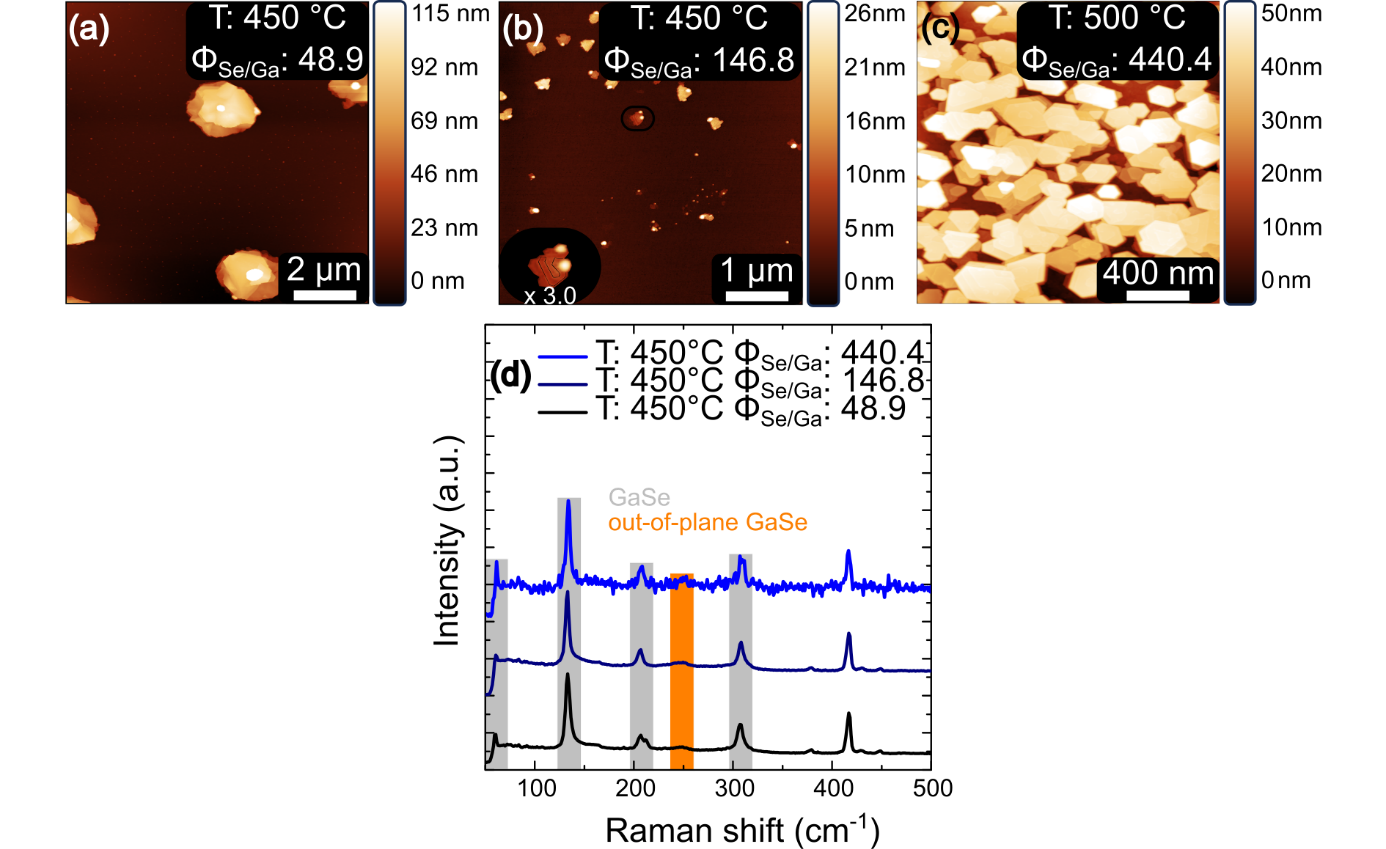


| *Figure S1: Morphology and spectroscopic characterization of GaSe grown at 450 °C on sapphire:*  *(a) AFM image of a cluster consisting of a central grain with layered flakes growing outward.*  *(b) AFM image showing a grain from which an in-plane layered structure grows, featuring visible screw dislocations, with a 3.0× magnified inset of an individual screw dislocation.*  *(c) AFM image of hexagonal flakes that are still not coalesced.*  *(d) Raman spectra corresponding to (a–c), showing only GaSe- and substrate-related Raman modes.[1–7]* |
| --- |


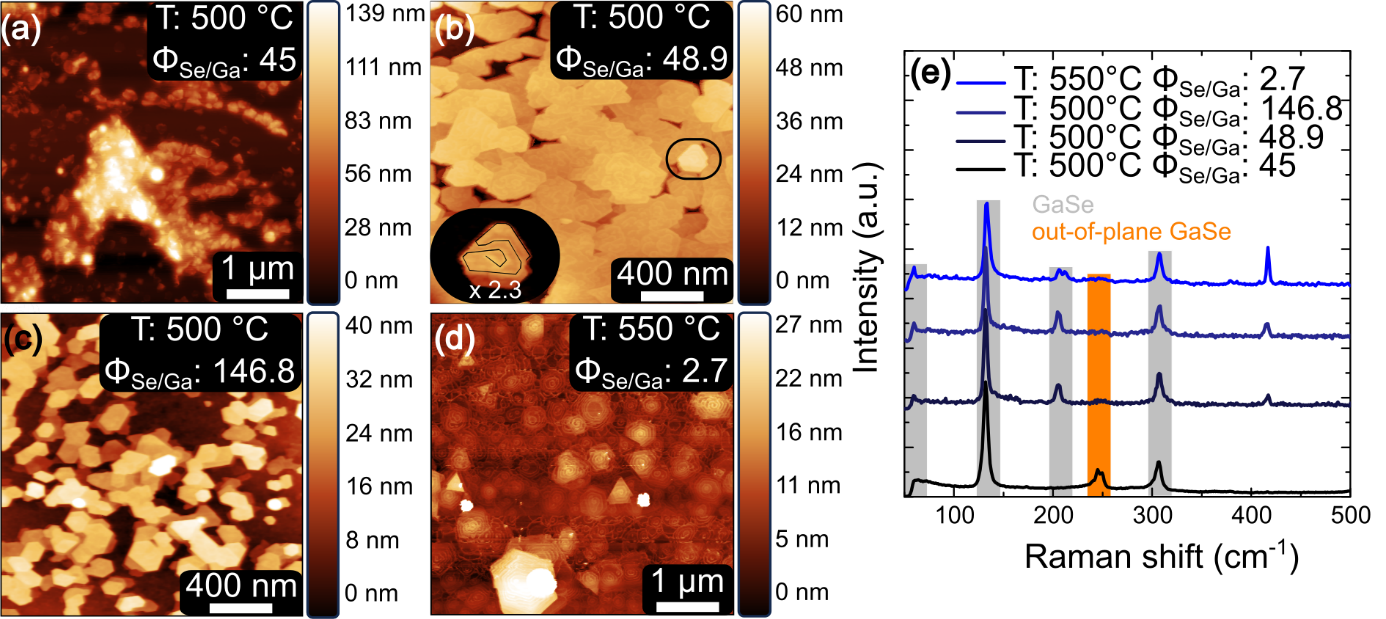


| *Figure S2: Morphology and spectroscopic characterization of GaSe grown at 500 and 550 °C on sapphire:*  *(a) AFM image of out-of-plane flakes.*  *(b) AFM image of non-coalesced hexagonal and trigonal flakes showing screw dislocations, with a 2.3× magnified inset of an individual screw dislocation.*  *(c) AFM image of hexagonal flakes that are still not coalesced.*  *(d) AFM image of screw dislocations in hexagonal and trigonal flakes with a fully coalesced underlying layer.*  *(e) Raman spectra corresponding to (a–d), showing only GaSe- and substrate-related Raman modes.[1–7]* |
| --- |


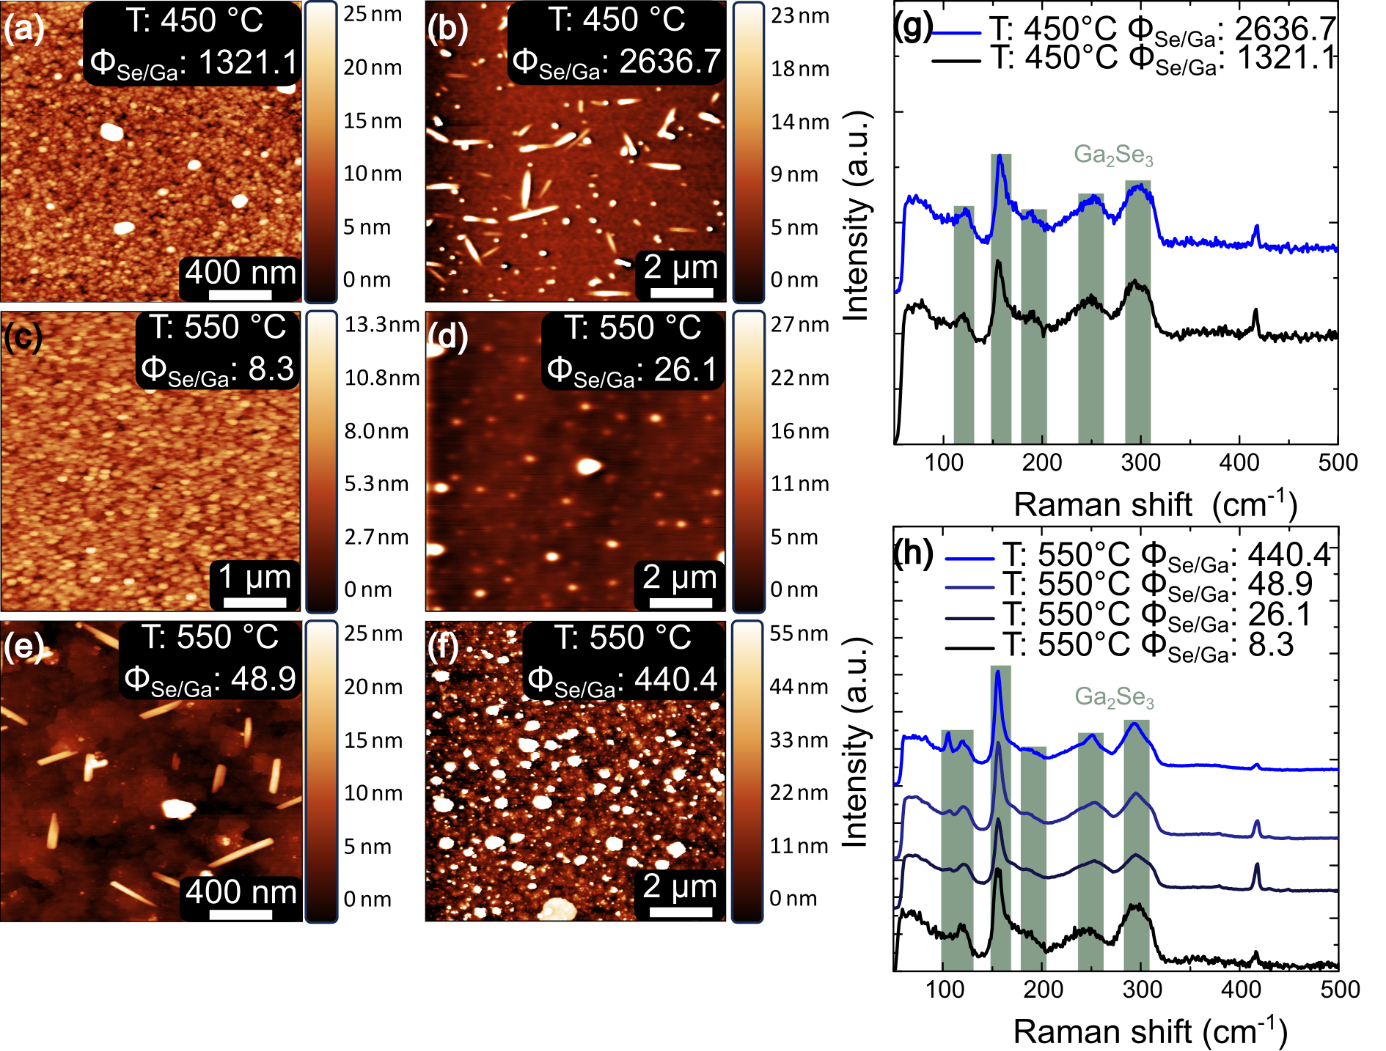


| *Figure S3: Morphology and spectroscopic characterization of Ga₂Se₃ grown at 450 and 550 °C on sapphire:*  *(a) AFM image of Ga2Se3 clusters.*  *(b) AFM image of a coalesced layer with clusters and rod-like structures on it.*  *(c) AFM image of Ga2Se3 clusters.*  *(d) AFM image of Ga2Se3 clusters.*  *(e) AFM image of layered Ga2Se3 and rod-like structures.*  *(f) AFM image of layered and clustered Ga2Se3 structures.*  *(g) Raman spectra corresponding to (a) and (b), showing only Ga2Se3- and substrate-related Raman modes.[2,3,8–11]*  *(h) Raman spectra corresponding to (c–f), showing only Ga2Se3- and substrate-related Raman modes.[2,3,8–11]* |
| --- |


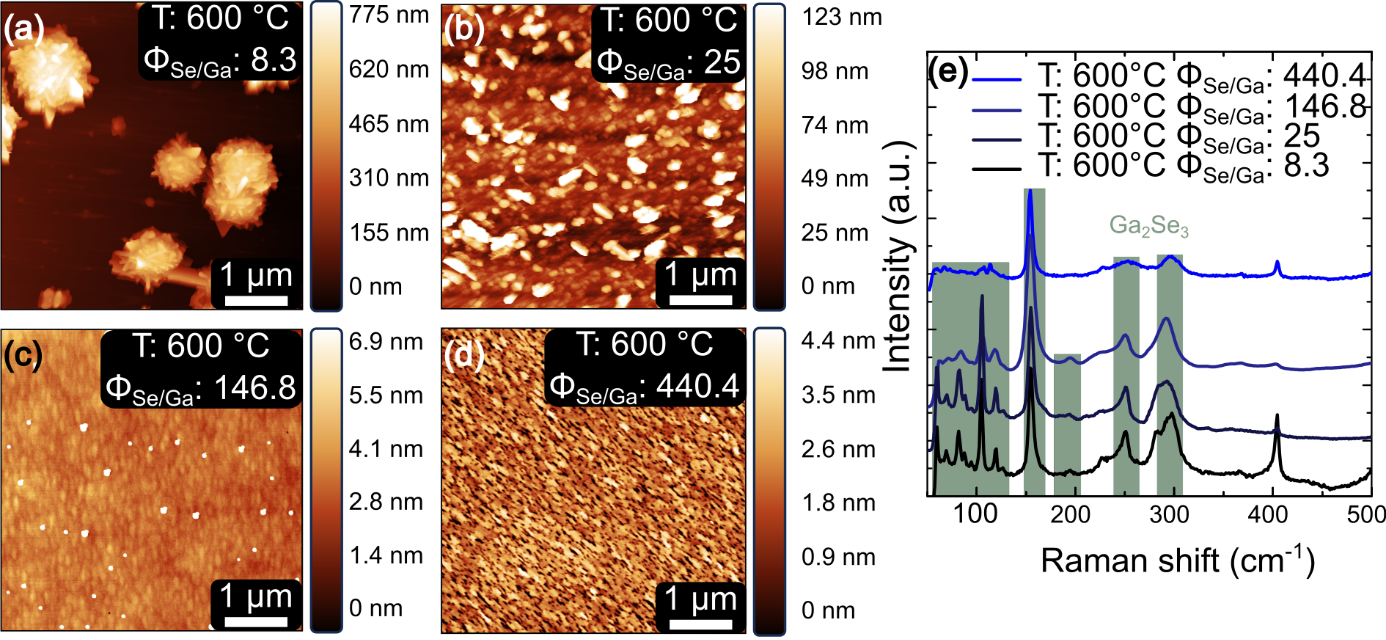


| *Figure S4. Morphology and spectroscopic characterization of Ga2Se3 grown at 600 °C on GaP/Si:*  *(a) AFM image of Ga2Se3 clusters with rod-like features.*  *(b) AFM image of Ga2Se3 clusters with rod-like features oriented in two perpendicular directions.*  *(c) AFM image of coalesced Ga2Se3 layers and clusters.*  *(d) AFM of small Ga2Se3 patches.*  *(e) Raman spectra corresponding to (a–d), showing only Ga2Se3- and substrate-related Raman modes.[8–15]* |
| --- |


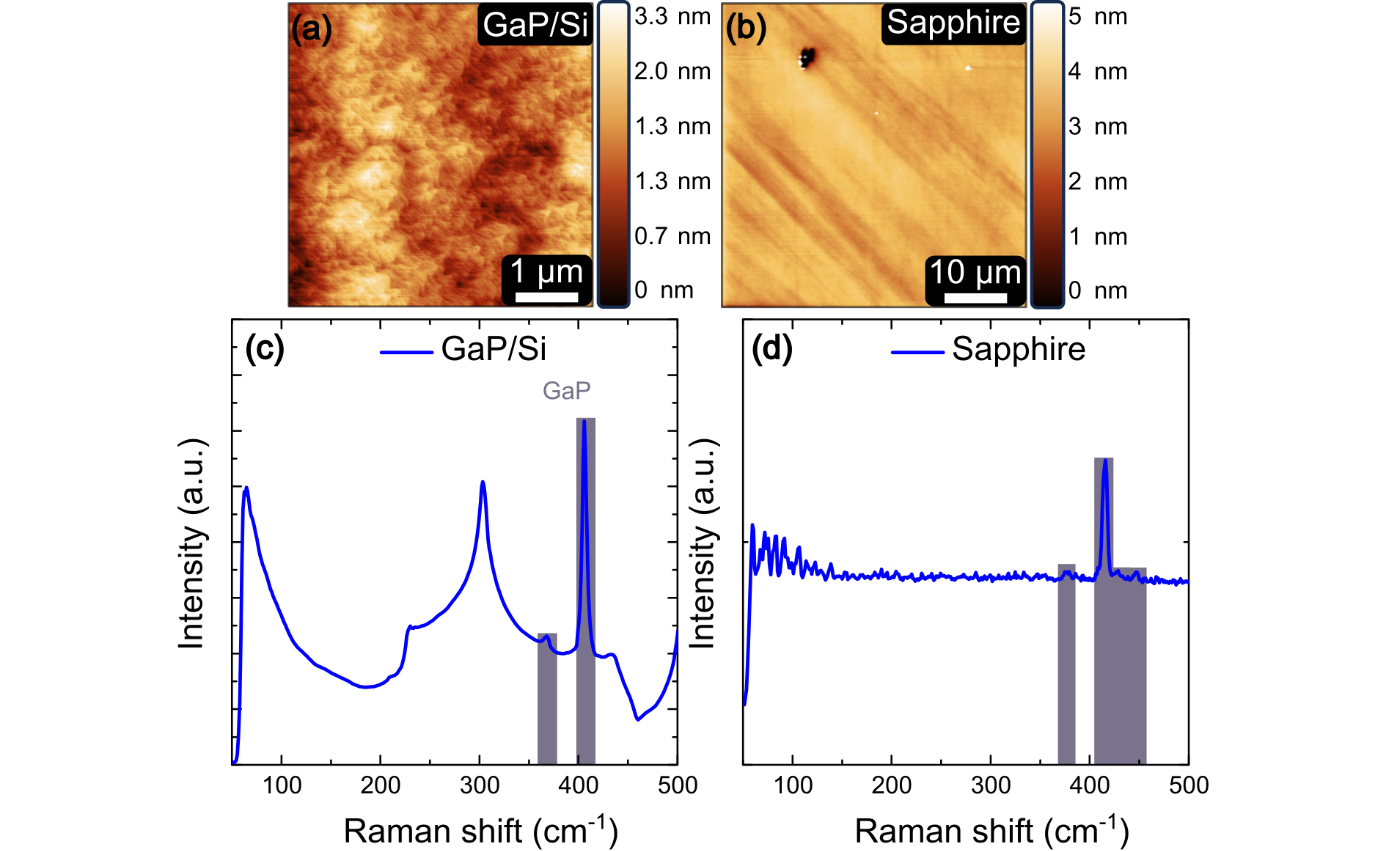


| *Figure S5: Morphology and spectroscopic characterization of GaP/Si and sapphire substrates:*  *(a) AFM image of GaP steps on the GaP/Si substrate.*  *(b) AFM image of the sapphire substrate showing polishing lines and a localized surface contamination.*  *(c) Raman spectra of the GaP/Si substrate, showing GaP peaks (marked) and additional signals from Si.[12–15]*  *(d) Raman spectra of sapphire, showing four characteristic sapphire-related Raman peaks (marked).[2,3]* |
| --- |


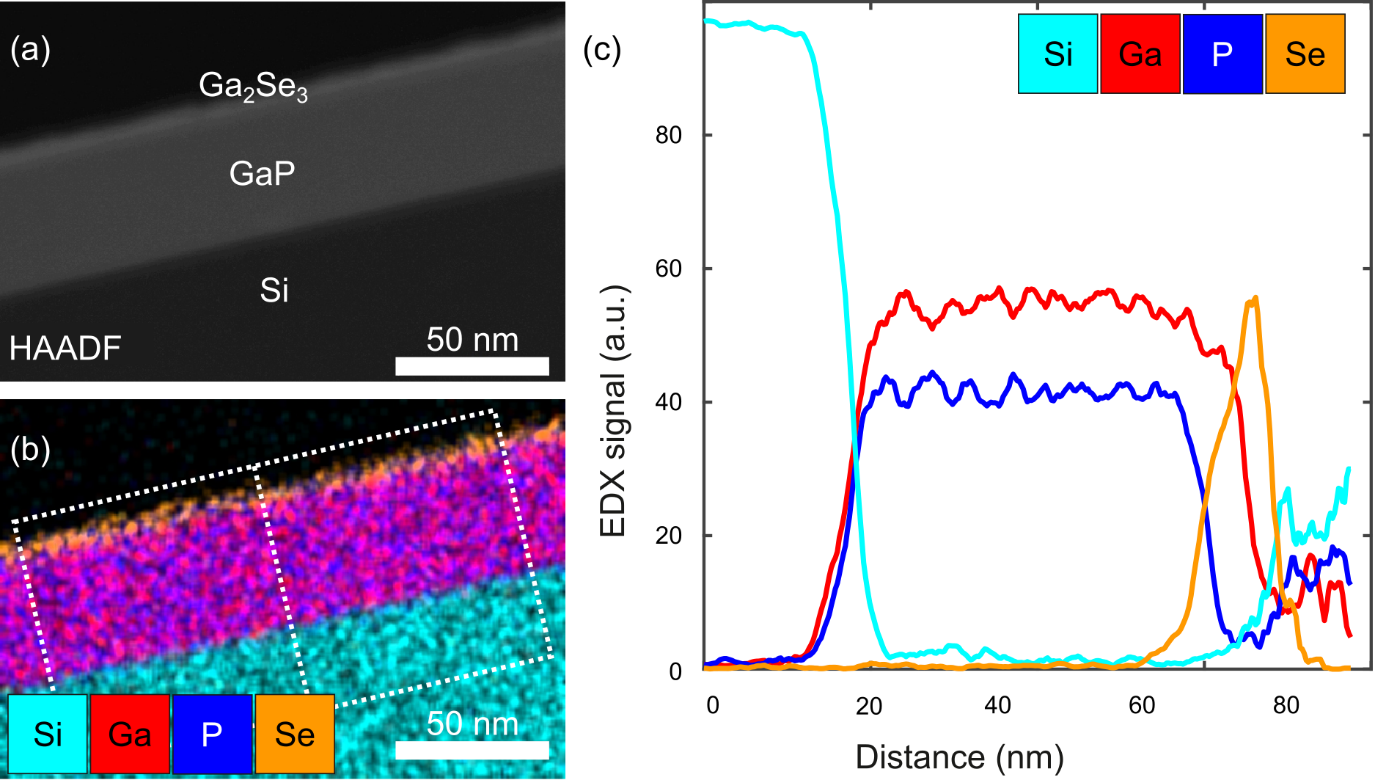


| *Figure S6: EDX Analysis of the Covalently bonded Ga2Se3 Layer on GaP/Si:*  *(a) Zoomed-out HAADF image of the Ga2Se3 layer from Figure 2(e) of thin Ga2Se3 layer.*  *(b) EDX map corresponding to (a).*  *(c) Averaged EDX line profile across the Ga2Se3, GaP, and Si interface extracted from the EDX map shown in (b), illustrating the 2:3 ratio of Ga and Se in the covalently bonded layer.* |
| --- |


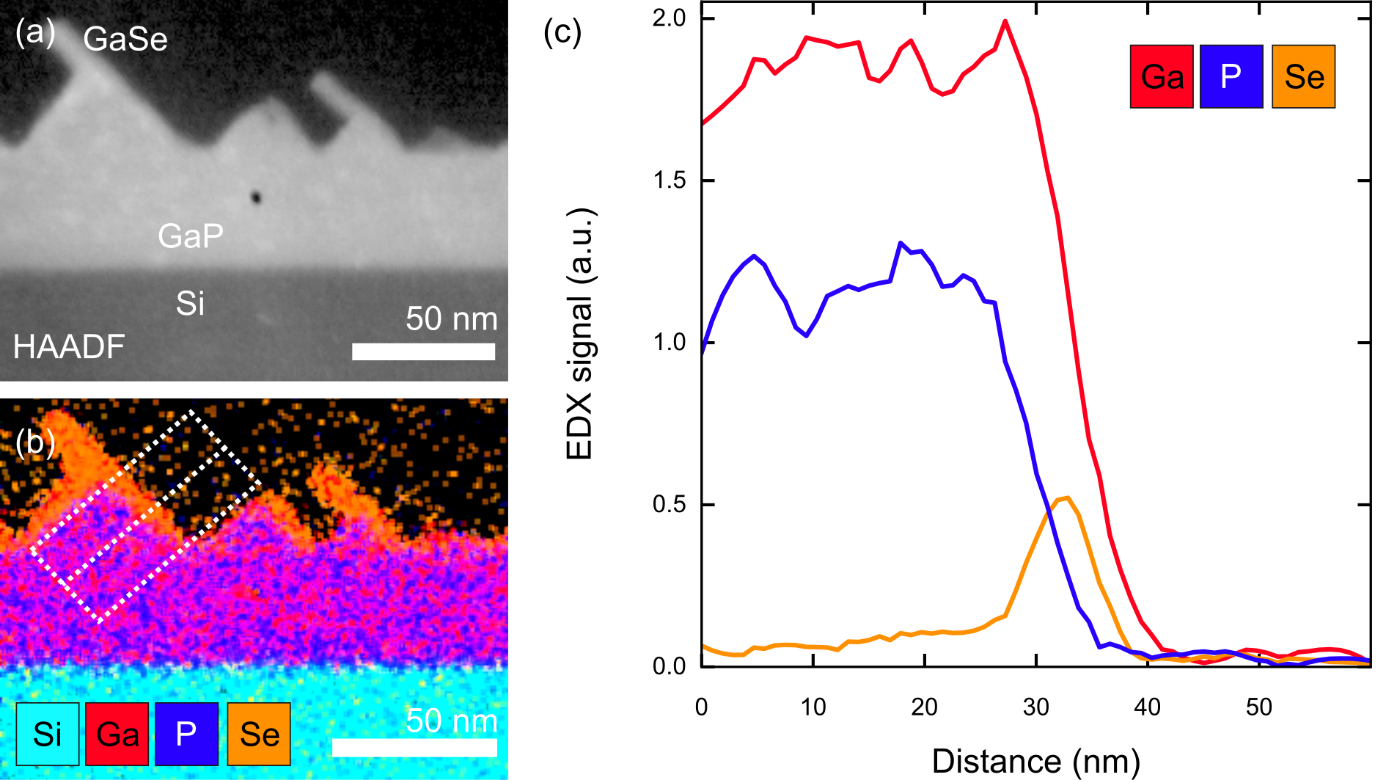


| *Figure S7: EDX Analysis of the 2D GaSe on GaP/Si:*  *(a) HAADF image of GaSe on GaP/Si from Figure 3(a,c)*  *(b) EDX map corresponding to (a).*  *(c) Averaged EDX line profile across the GaSe and GaP interface extracted from the EDX map shown in (b), illustrating a 1:1 ratio of Ga and Se in the van der Waals bonded layeres.* |
| --- |


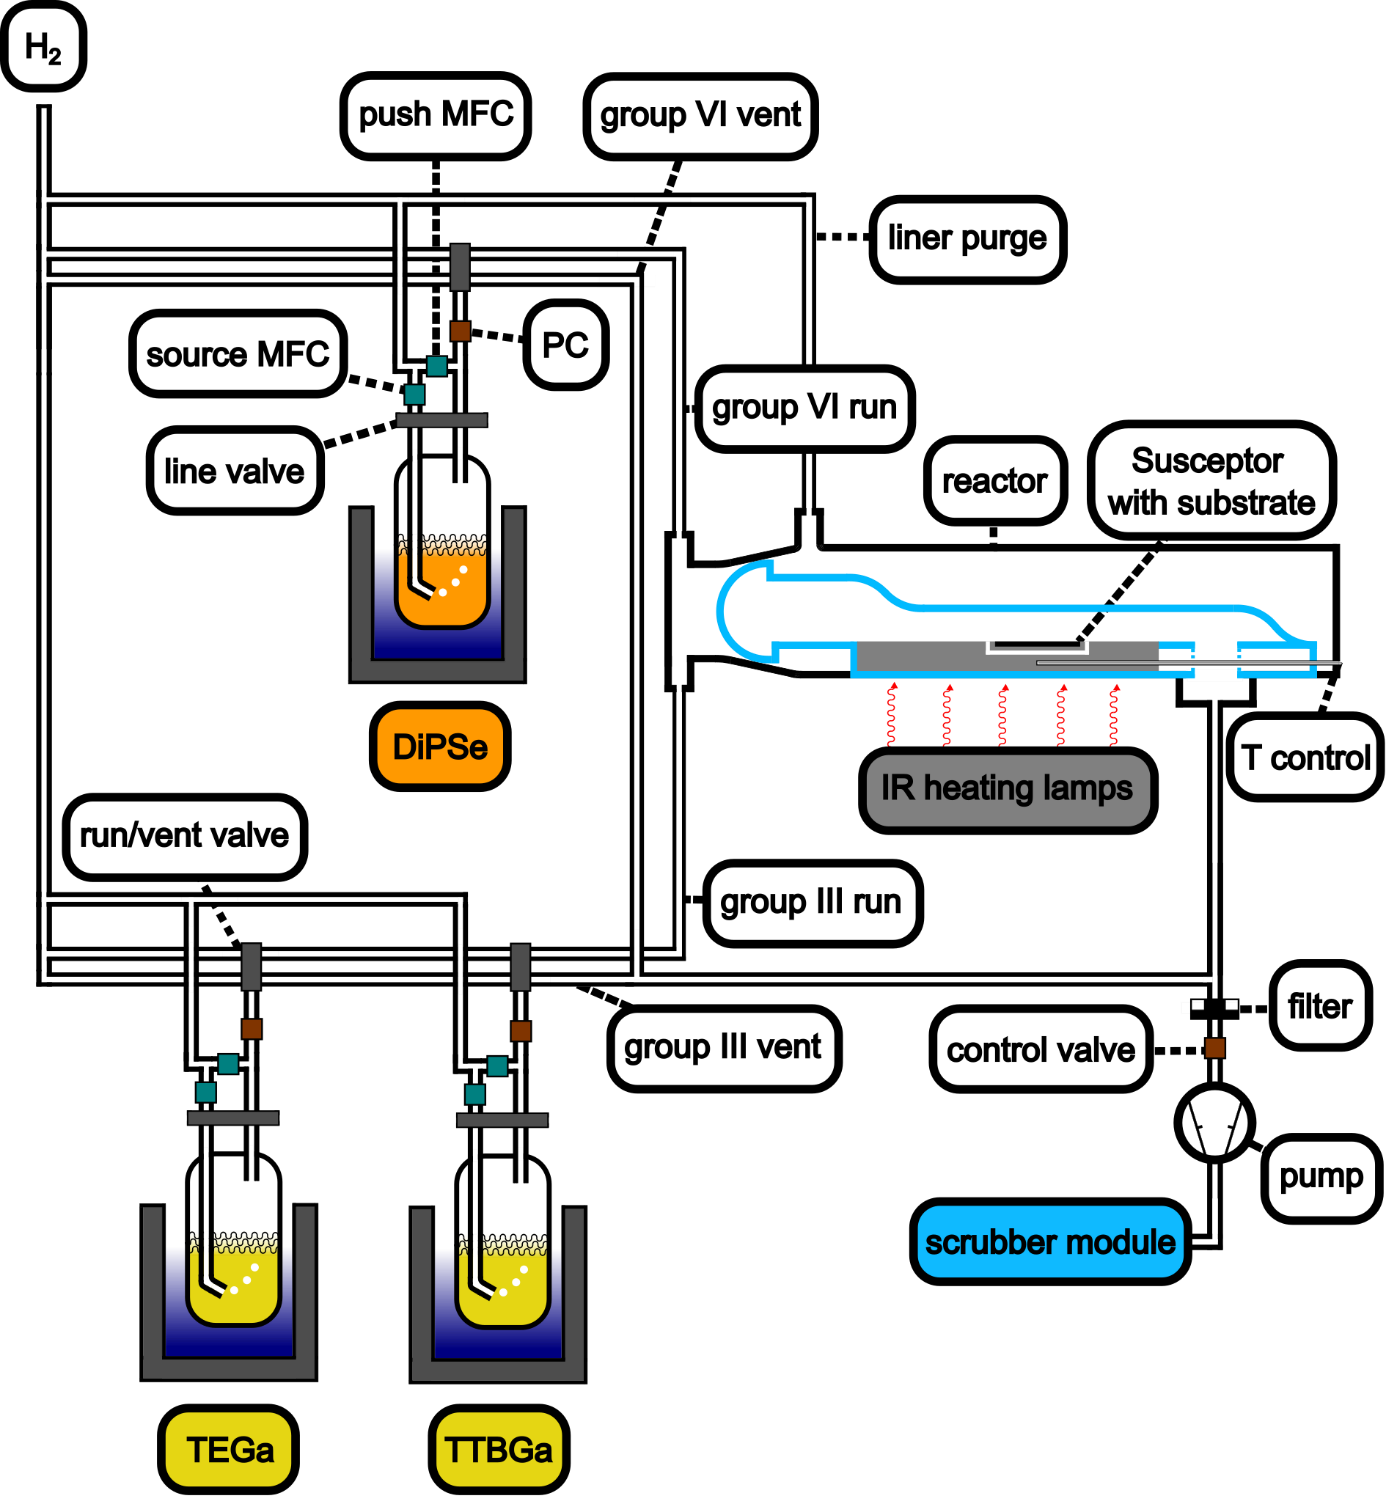


| *Figure S8: MOCVD reactor setup* |
| --- |

References

1. Rodriguez, R. D. *et al.* Selective Raman modes and strong photoluminescence of gallium selenide flakes on sp2 carbon. *Journal of Vacuum Science & Technology B, Nanotechnology and Microelectronics: Materials, Processing, Measurement, and Phenomena* **32**; 10.1116/1.4881995 (2014).

2. Vural, S. & Sari, Ö. Synthesis and characterization of SDS assistant α-alumina structures and investigation of the effect of the calcination time on the morphology. *Colloid Polym Sci* **297,** 107–114; 10.1007/s00396-018-4442-4 (2019).

3. Kadleı́ková, M., Breza, J. & Veselý, M. Raman spectra of synthetic sapphire. *Microelectronics Journal* **32,** 955–958; 10.1016/S0026-2692(01)00087-8 (2001).

4. Grzonka, J., Claro, M. S., Molina‐Sánchez, A., Sadewasser, S. & Ferreira, P. J. Novel Polymorph of GaSe. *Adv Funct Materials* **31**; 10.1002/adfm.202104965 (2021).

5. Diep, N. Q. *et al.* Growth Mode Transition in Two-Dimensional GaSe on Three-Dimensional GaN/Sapphire Platform: Implication for Self-Powered Photodetection. *ACS Appl. Nano Mater.* **7,** 3042–3049; 10.1021/acsanm.3c05343 (2024).

6. Avdienko, P. *et al.* Structural and Optical Properties of GaSe/GaAs(001) Layers Grown by Molecular Beam Epitaxy. *Acta Phys. Pol. A* **136,** 608–612; 10.12693/APhysPolA.136.608 (2019).

7. Diep, N. Q. *et al.* Screw-Dislocation-Driven Growth Mode in Two Dimensional GaSe on GaAs(001) Substrates Grown by Molecular Beam Epitaxy. *Scientific reports* **9,** 17781; 10.1038/s41598-019-54406-5 (2019).

8. Bletskan, D. I., Kabatsii, V. N. & Kranjčec, M. Photoelectric properties of ordered-vacancy Ga2Se3 single crystals. *Inorg Mater* **46,** 1290–1295; 10.1134/S0020168510120034 (2010).

9. Emde, M. von der *et al.* MOCVD growth of Ga2Se3 on GaAs(100) and GaP(100): a Raman study. *Applied Surface Science* **104-105,** 575–579; 10.1016/S0169-4332(96)00205-X (1996).

10. Märkl, A., Emde, M. von der, Nowak, C., Richter, W. & Zahn, D. Investigation of Se capping of epitaxial Ga 2 Se 3 layers. *Surface Science* **331-333,** 631–635; 10.1016/0039-6028(95)00356-8 (1995).

11. Finkman, E., Tauc, J., Kershaw, R. & Wold, A. Lattice dynamics of tetrahedrally bonded semiconductors containing ordered vacant sites. *Phys. Rev. B* **11,** 3785–3794; 10.1103/PhysRevB.11.3785 (1975).

12. Seo, H. W., Bae, S. Y., Park, J., Yang, H. & Kim, S. Synthesis of gallium phosphide nanowires via sublimation method. *Chem. Commun.,* 2564–2565; 10.1039/B207995J (2002).

13. Dubey, R. L., Dubey, S. K., Yadav, A. D., Sulania, I. & Kanjilal, D. Raman scattering and FTIR studies of 100 MeV Fe 9+ ion-irradiated gallium phosphide. *Radiation Effects and Defects in Solids* **166,** 743–748; 10.1080/10420150.2011.578633 (2011).

14. Abdullayeva, S. H. *et al.* GaInPN/Si heterostructure growth by metal-organic vapour phase epitaxy. *Fizika (Baku)* **15,** 18–23 (2009).

15. Lee, W.-J. & Chang, Y.-H. Growth without Postannealing of Monoclinic VO2 Thin Film by Atomic Layer Deposition Using VCl4 as Precursor. *Coatings* **8,** 431; 10.3390/coatings8120431 (2018).
